# Supplementary material for: Ooplasmic flow cooperates with transport and anchorage in Drosophila oocyte posterior determination
Source: PubMed Central journal article supplement — J Cell Biol. 2018 Oct 1;217(10):3497–511. doi: 10.1083/jcb.201709174 (PMC6168253; doi:10.1083/jcb.201709174), 2018-10-01
Supplement: JCB_201709174_sm.pdf [file JCB_201709174_sm.pdf]

## Supplemental material

Lu et al., <https://doi.org/10.1083/jcb.201709174>

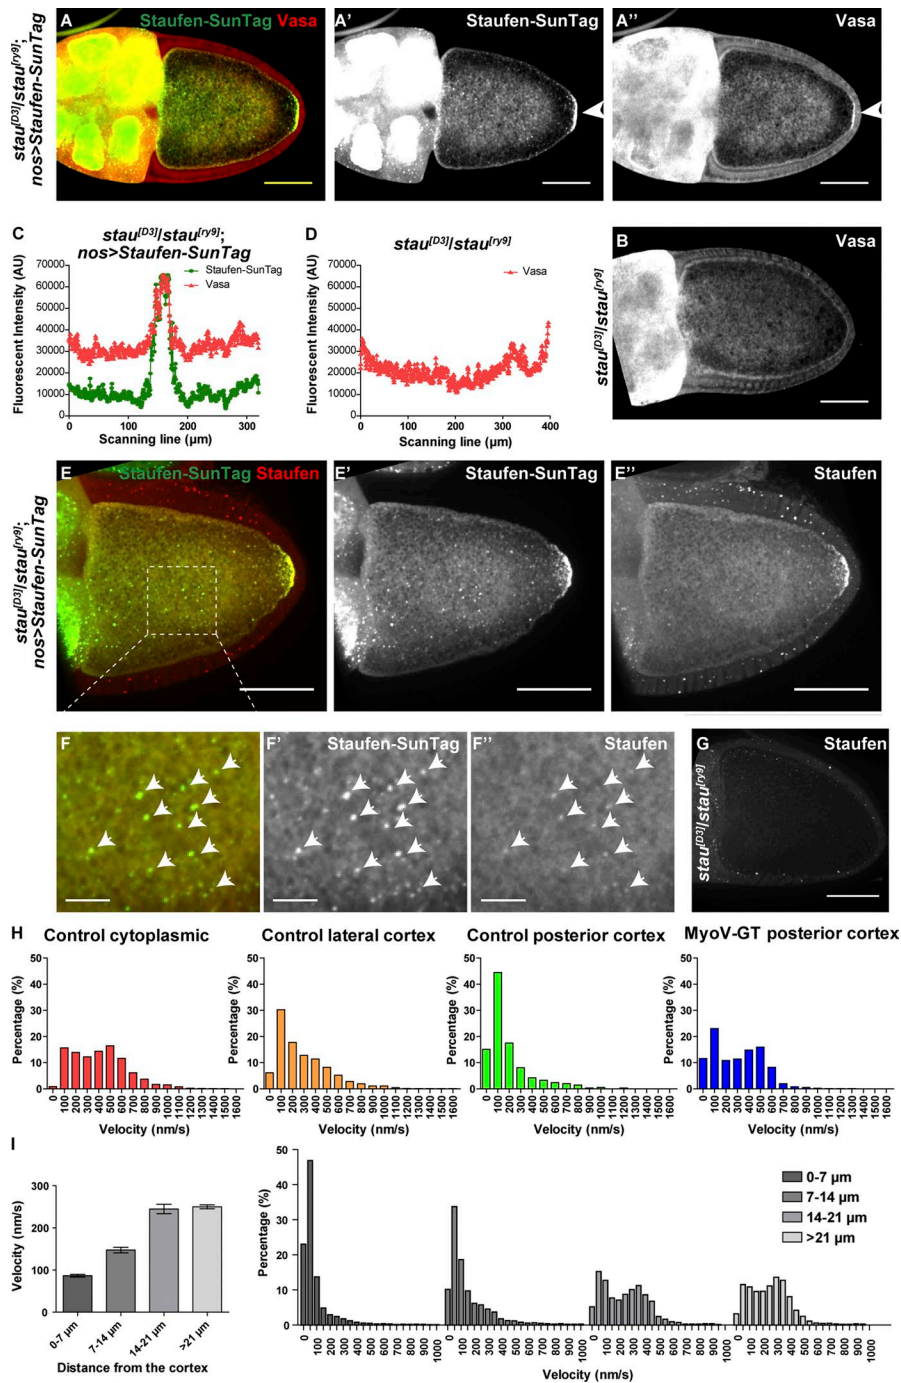

Figure S1. **Staufen-SunTag particles are functional and move at different velocities in different areas of the oocyte.** (A–A'') Staufen-SunTag in *stau<sup>[D3]</sup>/stau<sup>[ry9]</sup>* ovaries with Vasa staining. In the absence of endogenous Staufen, Staufen-SunTag forms a tight crescent at the posterior pole of the oocyte (A', arrowhead) and recruits Vasa to the posterior pole (A'', arrowhead;  $n = 67$ ). (B) No Vasa accumulation at the posterior pole in *stau<sup>[D3]</sup>/stau<sup>[ry9]</sup>* oocytes ( $n = 72$ ). (C and D) Plot profile of Staufen-SunTag and Vasa along the oocyte cortex in A and B. The fluorescent intensity peak of Vasa staining overlaps the fluorescent intensity peak of the Staufen-SunTag signal in the Staufen-SunTag-rescued *stau<sup>[D3]</sup>/stau<sup>[ry9]</sup>* oocyte (C), whereas there is no clear peak of Vasa staining at the posterior pole in *stau<sup>[D3]</sup>/stau<sup>[ry9]</sup>* mutant (D). (E and F) Staufen-SunTag in *stau<sup>[D3]</sup>/stau<sup>[ry9]</sup>* ovaries with Staufen staining. (E' and E'') Individual channels of either Staufen-SunTag (E') or Staufen staining (E'') shown in E. (F–F'') A magnified area of E indicated by the dashed box. In the absence of endogenous Staufen, Staufen-SunTag forms a tight crescent at the posterior pole and Staufen puncta (arrowheads) in the cytoplasm of the oocyte. Both the crescent and cytoplasmic puncta are positive for Staufen staining ( $n = 30$ ). (G) No Staufen staining in the *stau<sup>[D3]</sup>/stau<sup>[ry9]</sup>* oocyte. (H) Histograms of Staufen-SunTag velocities in control cytoplasmic ( $n = 3,491$ ), control lateral cortex ( $n = 2,144$ ), control posterior cortex ( $n = 542$ ), and *MyoV* mutant posterior cortex ( $n = 1,084$ ). This is the same set of data as in Fig. 1 C. (I) Average velocities and histograms of Staufen-SunTag particles at different distances from the cortex of the posterior half of control oocytes tracked by Nikon Elements: 0–7  $\mu\text{m}$ ,  $n = 6,073$ ; 7–14  $\mu\text{m}$ ,  $n = 2,324$ ; 14–21  $\mu\text{m}$ ,  $n = 876$ ; and >21  $\mu\text{m}$ ,  $n = 4,250$ . Bars: 50  $\mu\text{m}$  (main images); 10  $\mu\text{m}$  (insets).

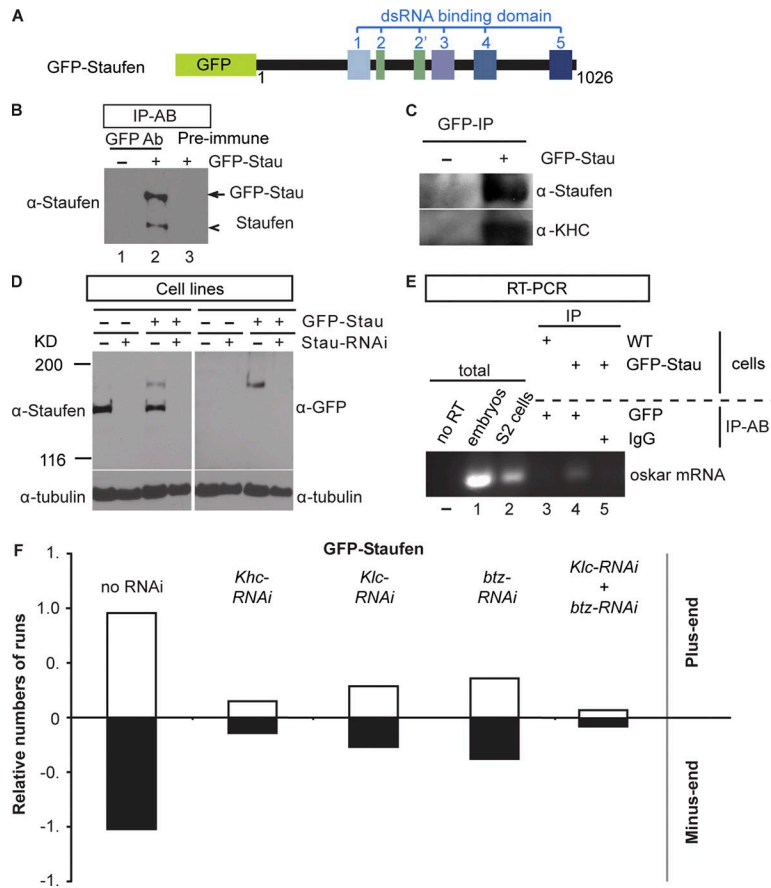

**Figure S2. GFP-Staufen forms an RNP complex in S2 cells and is transported by kinesin-1.** (A) A schematic illustration of the GFP-Staufen construct used in this study. GFP is fused to the N terminus of full-length *Drosophila* Staufen that carries five dsRNA-binding domains. (B) IP of GFP-Staufen pulls down the endogenous Staufen, indicating GFP-Staufen forms a complex with endogenous Staufen (lane 2). Two controls were used: (1) parental cell lines were subjected to GFP-IP (lane 1), and (2) preimmune IgG was used for GFP-Staufen cell lines (lane 3). (C) Staufen associates with KHC. IP using anti-GFP antibody in parental S2 (-) or stable cell lines expressing GFP-Staufen (+) showed that Staufen associates with KHC. (D and E) Characterization of cell lines stably expressing GFP-Staufen. (D) Parental S2 and GFP-Staufen cell lines were treated with or without dsRNA containing the coding region of Staufen (Stau-RNAi). Immunoblotting for Staufen confirmed that both endogenous and ectopic expression of Staufen were knocked down (KD) upon RNAi treatment. (E) RT-PCR of *osk* mRNA from GFP-IP in GFP-Staufen cells. no RT lane, no RT-PCR (negative control); lanes 1 and 2 are total RNA from *Drosophila* embryos, and S2 cells were used as positive control. Lanes 3 and 4 are GFP-IP from untransfected and GFP-Staufen cells, respectively. Lane 5 is rabbit IgG-IP control from GFP-Staufen cells. (F) Staufen uses two adaptors for kinesin-1. GFP-Staufen movement in *Khc-RNAi*, *Klc-RNAi*, *btz-RNAi*, or *Klc-RNAi + btz-RNAi* showed that both KLC and Btz are required for Staufen movement.

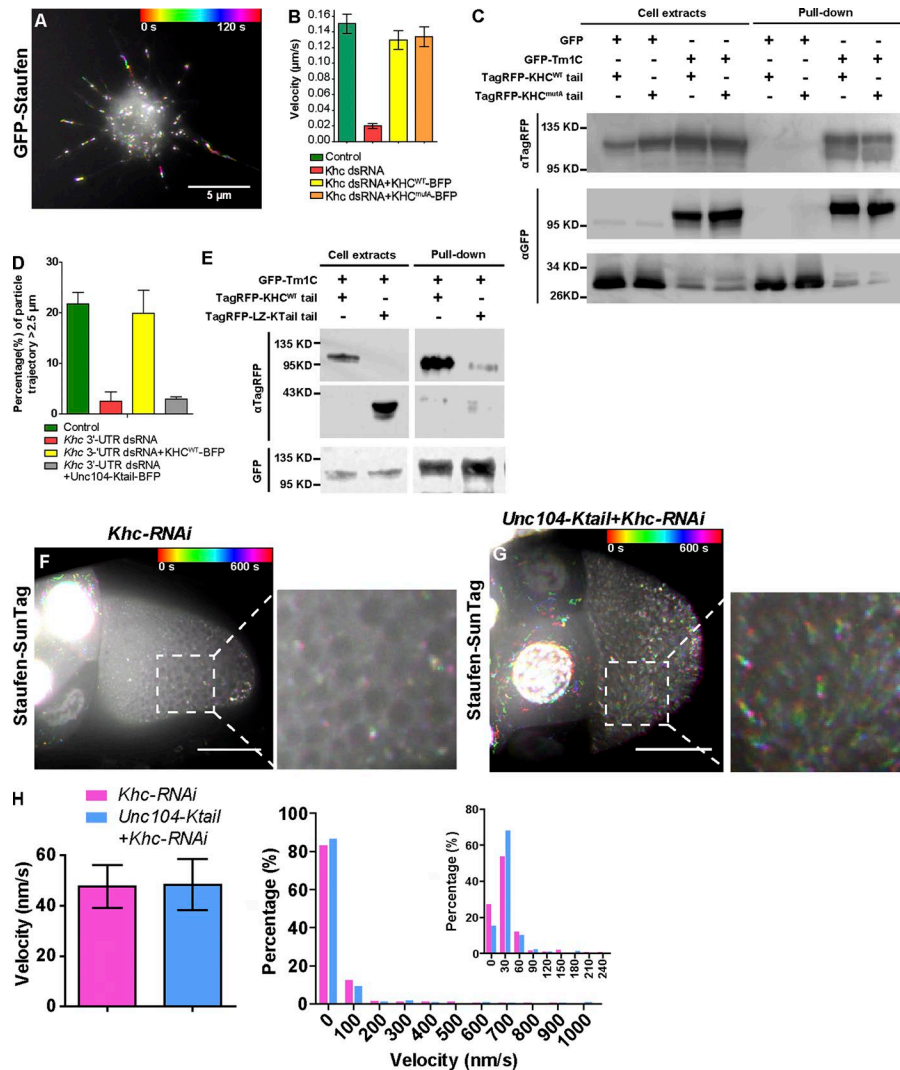

**Figure S3. *KHC<sup>mutA</sup>* does not affect Staufen transport along microtubules, and chimeric *Unc104-Ktail* motor cannot transport Staufen particles.** **(A)** A temporal color-coded image of GFP-Staufen transport in an S2 cell treated with CytoD. GFP-Staufen transport is shown as rainbow tracks in the microtubule-filled processes. **(B)** Quantification of velocities (mean  $\pm$  95% confidence intervals) of GFP-Staufen in four conditions: (1) control,  $n = 962$ ; (2) *Khc* 3'UTR-dsRNA,  $n = 221$ ; (3) *Khc* 3'UTR-dsRNA+*KHC<sup>WT</sup>*-BFP,  $n = 1,135$ ; and (4) *Khc* 3'UTR-dsRNA+*KHC<sup>mutA</sup>*-BFP,  $n = 771$ . Percentages of tracked particles with velocity  $>0.1 \mu\text{m/s}$ : (1) control, 37.9% (365/962); (2) *Khc* 3'UTR-dsRNA, 1.4% (3/221); (3) *Khc* 3'UTR-dsRNA+*KHC<sup>WT</sup>*-BFP, 29.4% (334/1,135); and (4) *Khc* 3'UTR-dsRNA+*KHC<sup>mutA</sup>*-BFP, 37.7% (291/771). **(C)** *KHC<sup>mutA</sup>* tail interacts with Tm1C as efficiently as *KHC<sup>WT</sup>* tail. GFP or GFP-Tm1C was cotransfected with either TagRFP-*Khc<sup>WT</sup>* tail or TagRFP-*Khc<sup>mutA</sup>* tail (without the motor domain; residues 345–975). GFP and GFP-Tm1C were pulled down by anti-GFP beads and probed with both TagRFP antibody (top) and anti-GFP antibody (bottom). **(D)** GFP-Staufen particles in S2 cells were tracked in four following conditions: (1) control (no dsRNA); (2) *Khc* 3'-UTR dsRNA; (3) *Khc* 3'-UTR dsRNA+*KHC*-BFP (only coding region; no 3'UTR); and (4) *Khc* 3'-UTR dsRNA+*Unc104-Ktail*-BFP. The percentage of particles with  $>2.5 \mu\text{m}$  trajectory was calculated as a readout of GFP-Staufen motility in S2 cells: (1) control, 21.7% ( $n = 865$ ); (2) *Khc* 3'-UTR dsRNA, 2.6% ( $n = 270$ ); (3) *Khc* 3'-UTR dsRNA+*KHC*-BFP, 19.9% ( $n = 861$ ); and (4); *Khc* 3'-UTR dsRNA+*Unc104-Ktail*-BFP, 3.0% ( $n = 395$ ). **(E)** The chimeric motor tail does not interact with Tm1C. GFP-Tm1C was cotransfected with either TagRFP- *Khc<sup>WT</sup>* tail (*Khc* residues 345–975) or TagRFP-LZ-*Ktail* (leucine zipper-*Ktail* residues 905–975). GFP-Tm1C was pulled down by anti-GFP beads and probe with both TagRFP antibody (top) and anti-GFP antibody (bottom). **(F and H)** Chimeric *Unc104-Ktail* does not rescue Staufen transport along microtubules but partially rescues slow streaming in stage 9 oocytes. **(H)** Average velocities (mean  $\pm$  95% confidence intervals) and histograms of Staufen-SunTag velocities. Percentages of fast-moving particles ( $>100 \text{ nm/s}$ ): *Khc-RNAi*, 6.5% (34/527), and *Unc104-Ktail+Khc-RNAi*, 6.1% (25/410).

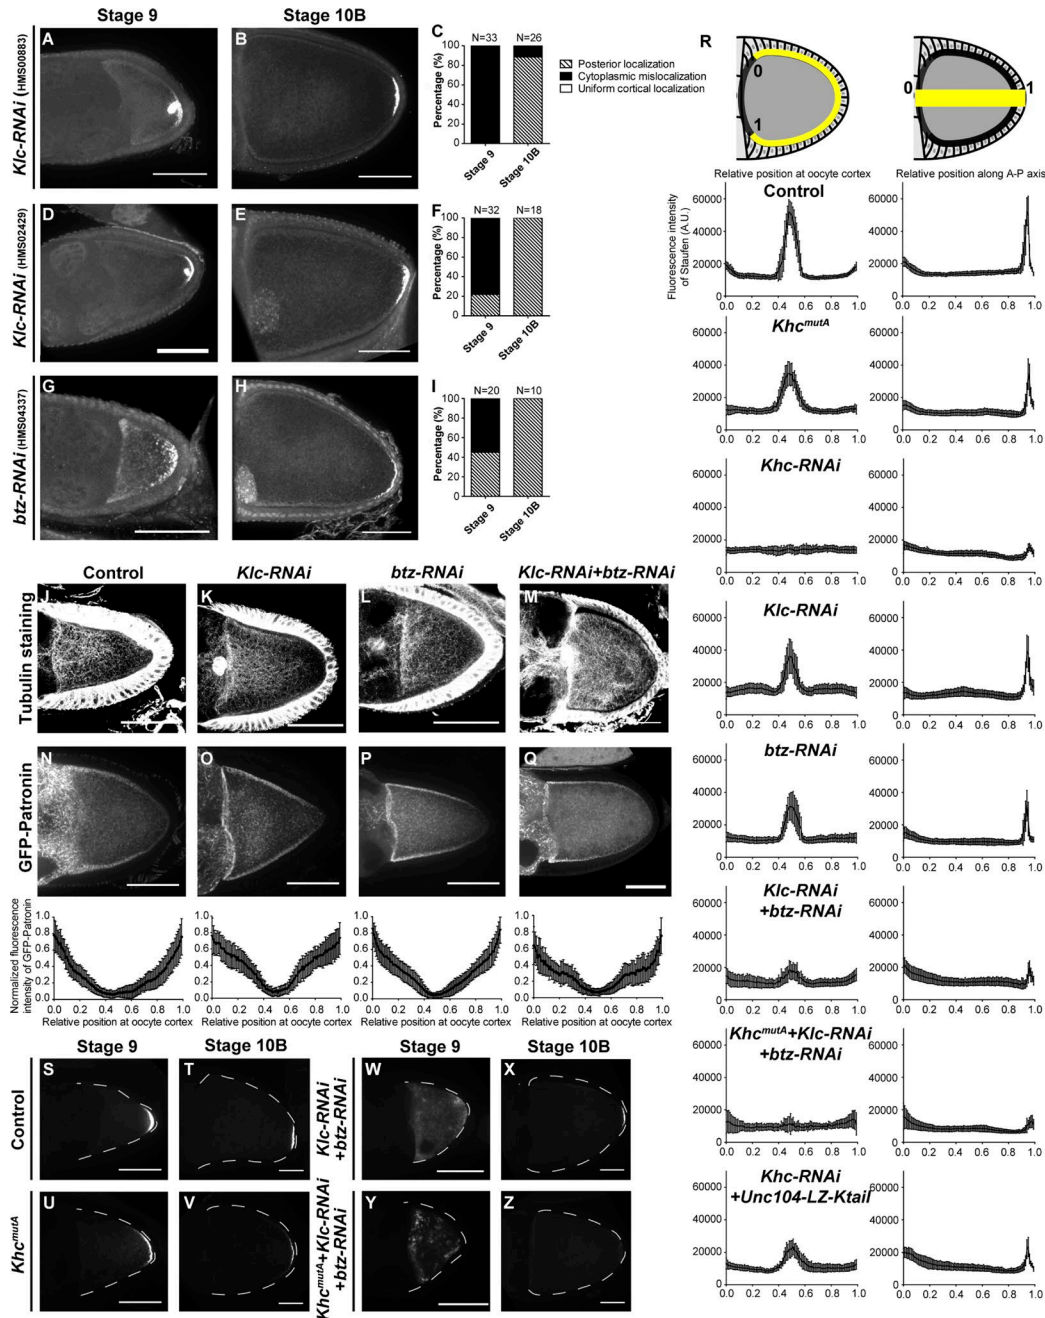

Figure S4. **Inhibition of transport only causes *osk*/Staufen mislocalization in stage 9 oocytes, while simultaneous inhibition of transport and streaming completely abolishes *osk*/Staufen posterior localization in stage 9 and stage 10B oocytes.** (A–C) Knockdown of KLC in the germ line by *Klc-TRiP RNAi-HMS00883* driven by *nos-Gal4-VP16* led to cytoplasmic mislocalization in 100% of the stage 9 oocytes (A and C) but no defects in 88.8% of the stage 10B oocytes (B and C). (D–F) Knockdown of KLC in the germ line by *Klc-TRiP RNAi-HMS02429* driven by *nos-Gal4-VP16* led to cytoplasmic mislocalization in 78.1% of the stage 9 oocytes (D and F) but no defects in the stage 10B oocytes (E and F). (G–I) Knockdown of Btz in the germ line by *btz-TRiP RNAi-HMS04337* driven by *nos-Gal4-VP16* led to cytoplasmic mislocalization in 55.0% of the stage 9 oocytes (G and I) but no defects in the stage 10B oocytes (H and I). (J–M) Tubulin staining in control (J), *nos>Klc-TRiP RNAi-GL00535* (K), *nos>btz-RNAi-TRiP.GLC01869* (L), and *nos>Klc-TRiP RNAi-GL00535 + btz-RNAi-TRiP.GLC01869* (M) oocytes. Images were processed using the Log function in ImageJ to show dim tubulin signal in the oocytes in the presence of the bright signal in the follicle cells. (N–Q) GFP-Patronin in control (N), *nos>Klc-TRiP RNAi-GL00535* (O), *nos>btz-TRiP RNAi-GLC01869* (P), and *nos>Klc-TRiP RNAi-GL00535 + btz-RNAi-TRiP.GLC01869* (Q) oocytes. Normalized GFP-Patronin signal along the cortex of the oocyte was quantified in following genotypes as a readout of the microtubule gradient: N, control,  $n = 28$ ; O, *nos>Klc-TRiP RNAi-GL00535*,  $n = 34$ ; P, *nos>btz-TRiP RNAi-GLC01869*,  $n = 38$ ; and Q, *nos>Klc-TRiP RNAi-GL00535 + btz-RNAi-TRiP.GLC01869*,  $n = 30$  (see the Quantification of GFP-Patronin in the oocytes section of Materials and methods for more details). (R) Quantification of Staufen staining along the oocyte cortex (left) and along anterior–posterior axis (right) in listed genotypes. Absolute fluorescence intensity (AU) of Staufen staining was plotted as a function of the normalized distance (illustrated as yellow lines in the cartoon from 0 to 1; see the Quantification of Staufen staining in the oocytes section of Materials and methods for more details). (S–Z) smFISH against *osk* mRNA in control (S,  $n = 32$ ; T,  $n = 49$ ), in *Khc<sup>mutA</sup>* (U,  $n = 20$ ; V,  $n = 27$ ), *Klc* and *btz* double RNAi (W,  $n = 42$ ; X,  $n = 53$ ), and *Khc<sup>mutA</sup>* with *Klc* and *btz* double RNAi (Y,  $n = 46$ ; Z,  $n = 29$ ). All the images were acquired and processed identically. Bars, 50  $\mu$ m.



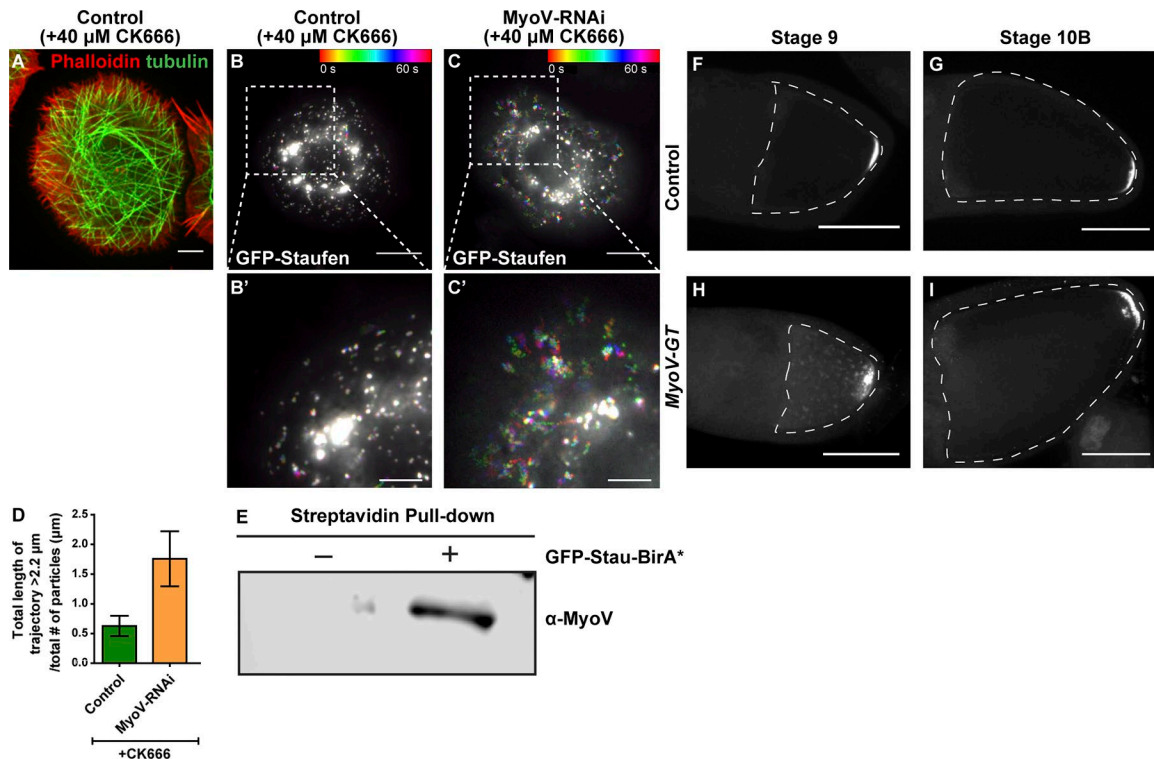

Figure S5. **MyoV functions as a local anchorage for Staufen.** (A) Microtubules (green; labeled by Dm1a tubulin staining) penetrated actin-enriched (red; labeled by rhodamine-phalloidin) lamellipodia in an S2 cell after CK666 treatment. (B and C) Temporal color-coded images showing GFP-Staufen movement in a control cell (B) and a MyoV-RNAi S2 cell (C). More GFP-Staufen movements (rainbow tracks) were seen in the MyoV-RNAi cells. (B' and C') A magnified area at the lamellipodia (dashed line box) of B and C. Bars: 5  $\mu\text{m}$  (main images); 2  $\mu\text{m}$  (insets). (D) Quantification of GFP-Staufen movement in control and MyoV-RNAi cells. Average trajectories (total length of trajectory  $>2.2 \mu\text{m}$ /total number of particles) for control cells and MyoV-RNAi cells are  $0.63 \pm 0.17 \mu\text{m}$  and  $1.76 \pm 0.46 \mu\text{m}$  (mean  $\pm$  SEM), respectively. (E) BioID pull-down assay showed that MyoV binds to the Staufen RNP complex. *Drosophila* WT S2 cells and GFP-Stau-BirA\* S2 cells were treated with biotin, lysed, pulled down by streptavidin-coated beads, and blotted against  $\alpha$ -MyoV antibody. MyoV was only pulled down in the GFP-Stau-BirA\* cells. (F and G) Staufen staining in control oocytes showed a compact posterior crescent at both stage 9 (F) and at stage 10B (G). (H and I) Ectopic expression of the dominant-negative MyoV mutant *MyoV-GT* caused Staufen mislocalization at both stage 9 and stage 10B (H, 70.6%,  $n = 17$ ; I, 42.1%,  $n = 19$ ). Bars, 50  $\mu\text{m}$ .

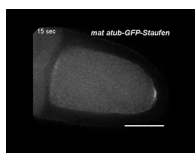

Video 1. **Staufen localization and movement in streaming oocytes.** Two representative examples of a *mat atub-GFP-Staufen* oocyte and a *nos>Staufen-SunTag* oocyte, respectively. Both GFP-Staufen and Staufen-SunTag formed posterior crescents and labeled cytoplasmic particles that were circulated with ooplasmic streaming. Both videos were imaged using identical conditions. To note, Staufen-SunTag labeling is much brighter than the GFP-Staufen. Bar, 50  $\mu\text{m}$ .

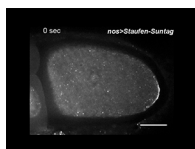

Video 2. **Streaming circulates Staufen particles to the anchorage site.** Staufen-SunTag particles were circulating along with the cytoplasmic flow and significantly slowed down near the posterior pole; some particles got incorporated into the posterior crescent. Bar, 50  $\mu\text{m}$ .

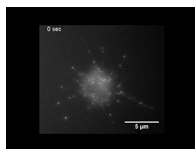

Video 3. **Staufen particles move on microtubules in S2 cells.** GFP-Staufen formed discrete particles and moved bidirectionally in the microtubule-filled processes induced by 5  $\mu\text{M}$  CytoD treatment. Bar, 5  $\mu\text{m}$ .

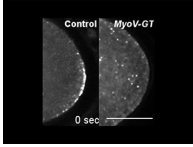

Video 4. **Inhibition of MyoV abolishes the deceleration of Staufen particles near the posterior cortex.** Distinct behaviors of Staufen-SunTag particles were observed near the posterior pole in control and *MyoV* mutant oocytes. Neither deceleration nor incorporation of Staufen-SunTag particles near the posterior pole of the oocyte with ectopic expression of *MyoV-GT* (right) compared with the control one (left). Bar, 50  $\mu\text{m}$ .
